# Supplementary material for: A new Miocene baleen whale from the Peruvian desert
Source: PubMed Central journal article supplement (PMC5098998; doi:10.1098/rsos.160542), 2016-10-05

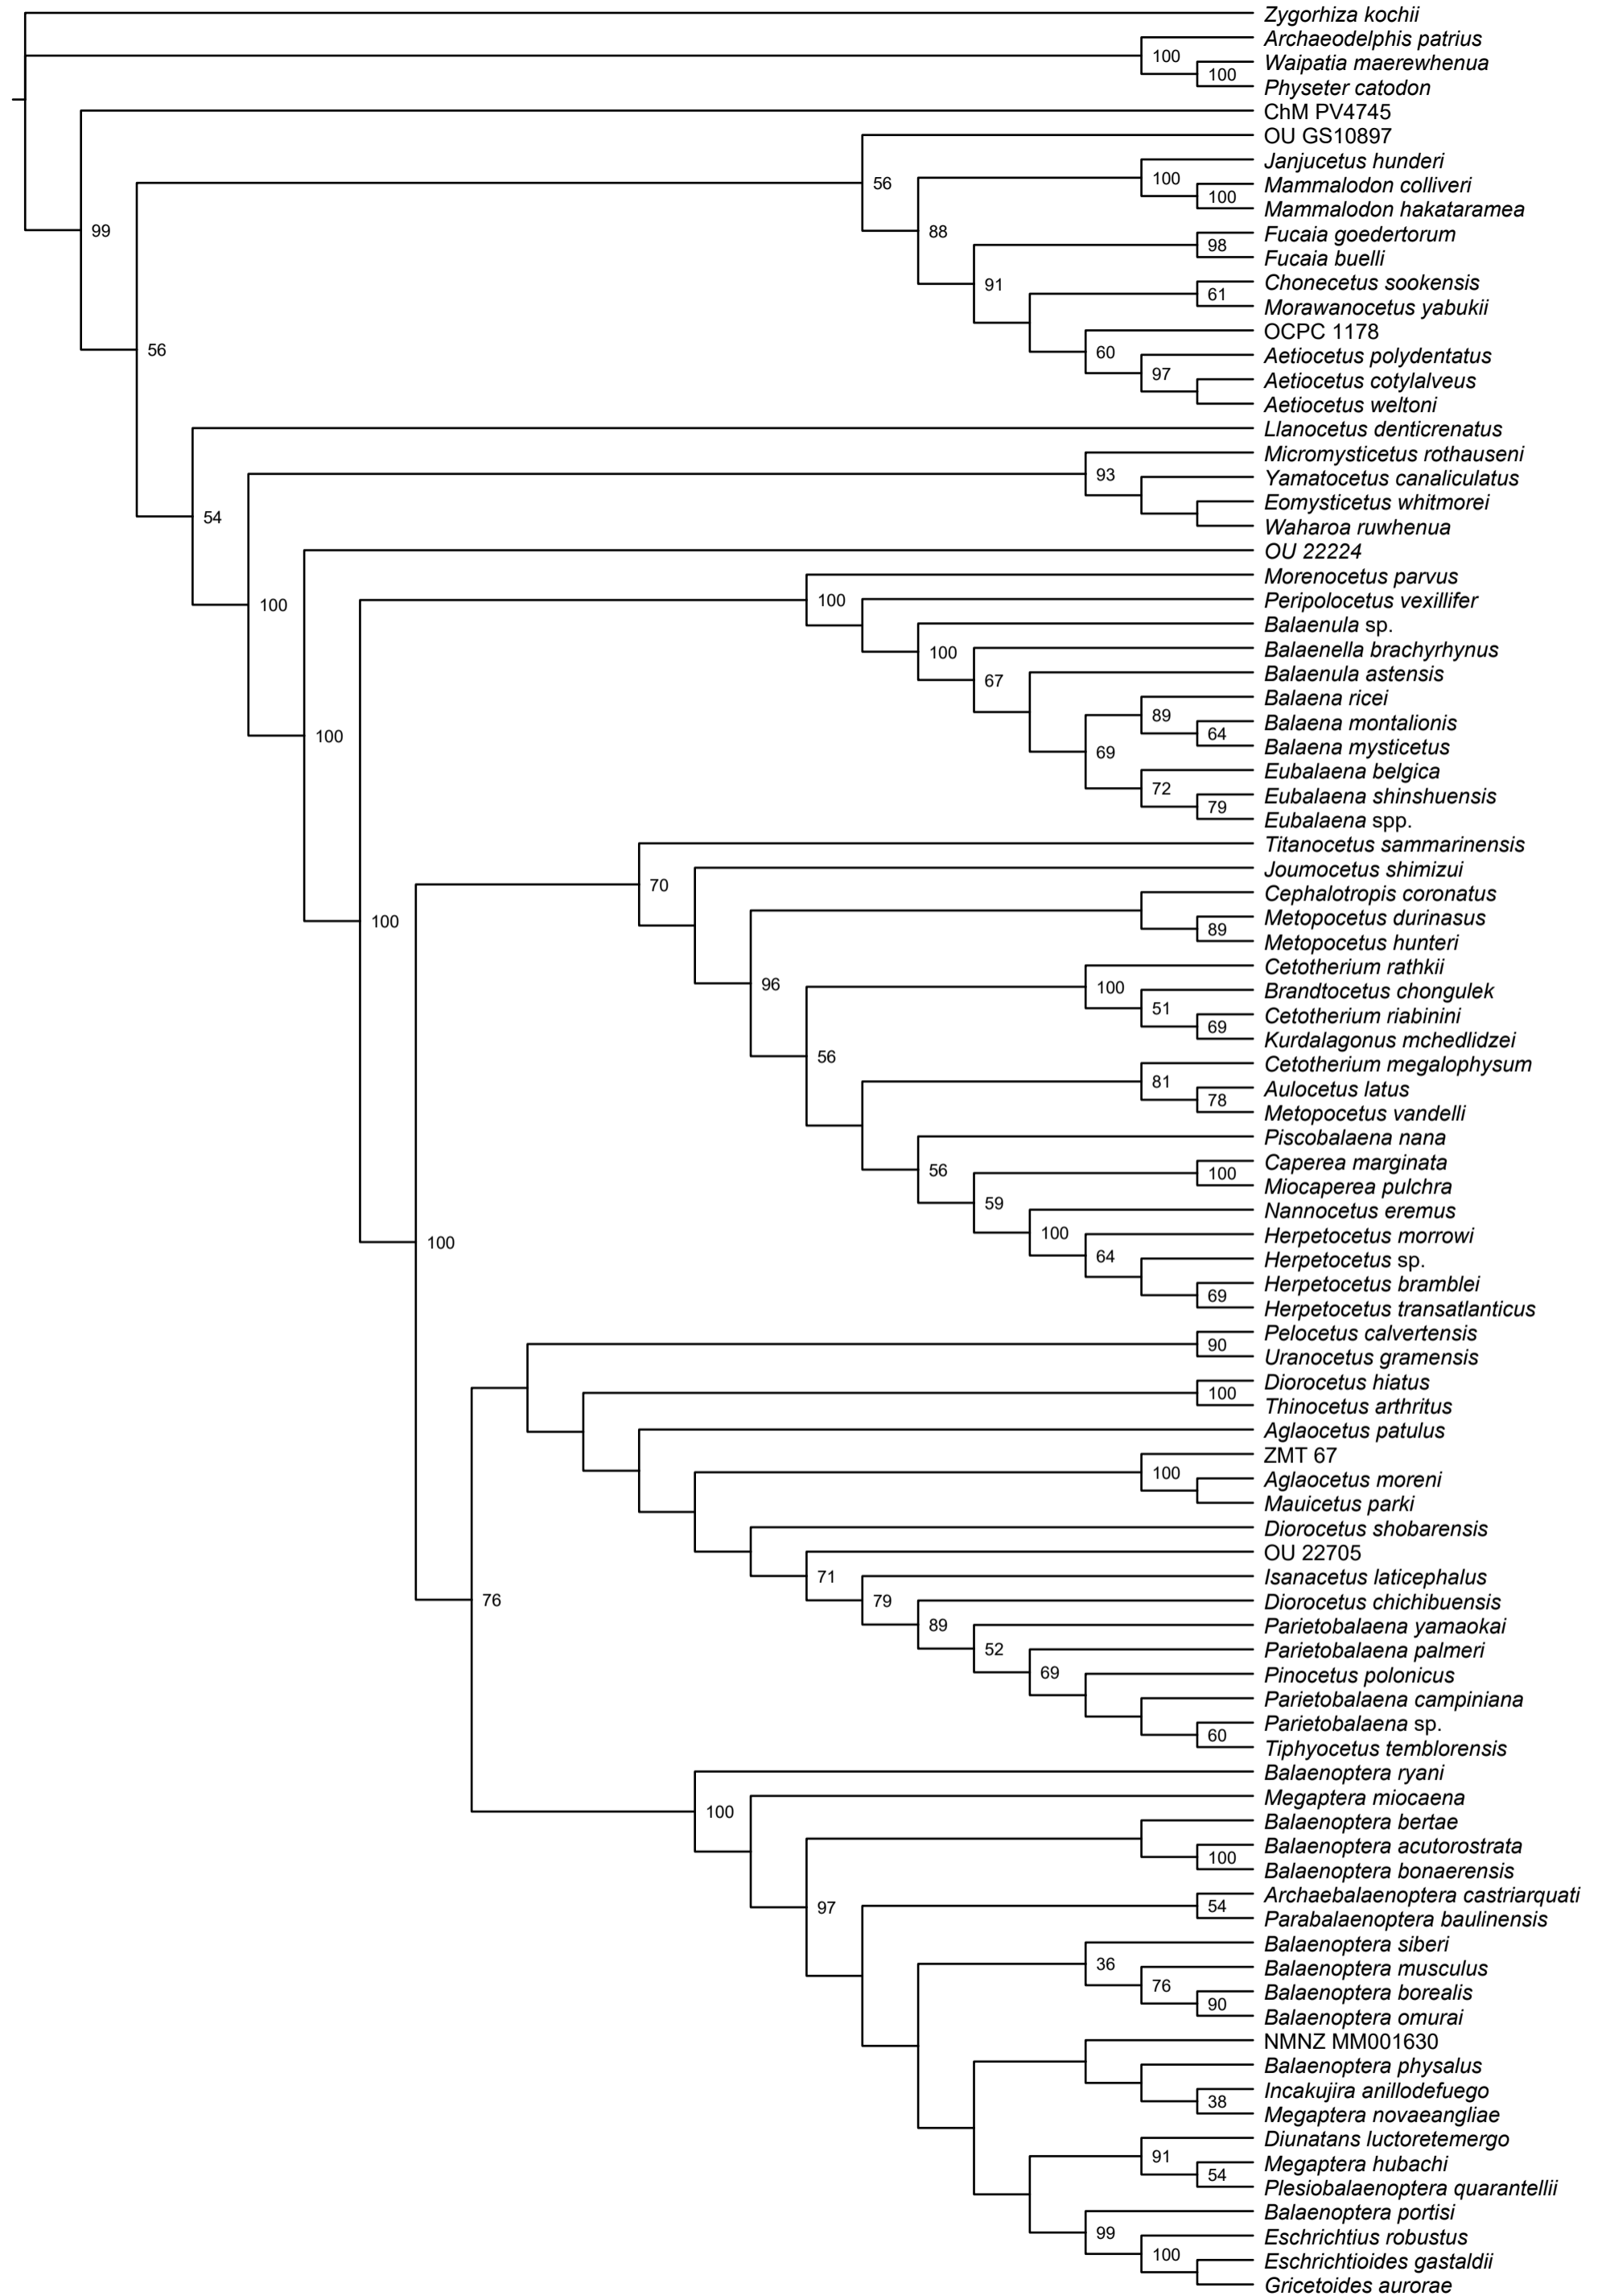

Supplement: rsos160542supp1.pdf [file rsos160542supp1.pdf]
